# Supplementary material for: Dynamic coupling modelling and application case analysis of high-slip motors and pumping units
Source: PLoS One. 2020 Jan 30;15(1):e0227827. doi: 10.1371/journal.pone.0227827 (PMC6992195; doi:10.1371/journal.pone.0227827)
Supplement: S1 Data — (XLSX) [file pone.0227827.s001.xlsx]

## Sheet: data
曲柄时间	曲柄转角	曲柄变速转角	曲柄角速度	曲柄变速角速度	曲柄角加速度	曲柄变速角加速度	Synchronous motor	High-slip motor	光杆初始加速度	光杆变化加速度	光杆初始位移	光杆变化位移	光杆初始载荷	光杆变化载荷	净扭矩	变化净扭矩	光杆扭矩	平衡扭矩	电机扭矩	电机变速扭矩
Time	Angle of torque (°)	曲柄变速转角	Synchronous motor	High-slip motor	Synchronous motor	High-slip motor	Synchronous motor	High-slip motor	Synchronous motor	High-slip motor	Synchronous motor	High-slip motor	Synchronous motor	High-slip motor	Synchronous motor	High-slip motor	光杆扭矩	平衡扭矩	Synchronous motor	High-slip motor		修正示功图数据
0	0	0	0.628319	0.628314	0	-0.00133399	-0.0635421	-0.0635417	0.831659	0.831378	0.00237705	0.0023395	29142	28575.5	-2578.83	-2584.01	-2584.01	0	-13.6704	-13.7087		28004
0.0292176	1	1.05184	0.628319	0.628313	0	-0.00251413	-0.0403161	-0.0391051	0.840539	0.840658	0.000934009	0.000839275	29477.3	28923.4	-2600.95	-2564.55	-1620.01	-944.542	-13.7876	-13.6958		28345
0.0584353	2	2.10367	0.628319	0.628315	0	-0.00340375	-0.0168499	-0.0144039	0.848944	0.84962	0.000139496	5.69387e-05	29794.1	29251.1	-2589.05	-2505.89	-617.097	-1888.8	-13.7246	-13.438		28666.1
0.0876529	3	3.15551	0.628319	0.628303	0	-0.00542671	0.00684275	0.0105462	0.85684	0.858158	0	0	30232.7	29712.8	-2498.53	-2345.82	486.659	-2832.47	-13.2447	-12.7651		29118.6
0.116871	4	4.20734	0.628319	0.628267	0	-0.00808495	0.0307472	0.0357258	0.86419	0.866419	0.00052161	0.000675484	30704.8	30211.3	-2249.76	-2040.51	1734.78	-3775.29	-11.926	-11.4243		29607.1
0.146088	5	5.25918	0.628319	0.628181	0	-0.0114123	0.0548479	0.0611108	0.870959	0.874451	0.00171	0.0020899	31200	30734.8	-1949.05	-1680.18	3036.78	-4716.96	-10.3319	-9.92554		30120.2
0.175306	6	6.31101	0.628319	0.62801	0	-0.0153998	0.0791281	0.0866709	0.87711	0.88228	0.00357038	0.00424918	31712.9	31277.8	-1594.37	-1262.5	4394.68	-5657.18	-8.45176	-8.28199		30652.2
0.204524	7	7.36285	0.628319	0.627718	0	-0.0199974	0.10357	0.112368	0.882606	0.889901	0.0061075	0.0071587	32238.2	31834.2	-1184.68	-786.061	5809.63	-6595.69	-6.27997	-6.50336		31197.5
0.233741	8	8.41468	0.628319	0.627268	0	-0.0251255	0.128155	0.138156	0.887412	0.89729	0.0093256	0.0108232	32772.5	32400.3	-719.514	-249.989	7282.2	-7532.19	-3.81415	-4.59073		31752.3
0.262959	9	9.46652	0.628319	0.626633	0	-0.0306882	0.152864	0.163987	0.891491	0.904413	0.0132284	0.0152467	33312.8	32973	-198.935	346.075	8812.46	-8466.39	-1.05456	-3.24938		32313.5
0.292176	10	10.5184	0.628319	0.625799	0	-0.036589	0.177676	0.189806	0.894809	0.911239	0.017819	0.0204326	33857.3	33550.2	376.679	1002.11	10400.1	-9398.01	2.55809	-0.41605		32879.2
0.321394	11	11.5681	0.628319	0.624758	0	-0.042744	0.202568	0.215509	0.897331	0.917733	0.0231	0.0263709	34404.6	34130.5	1006.69	1714.76	12041.5	-10326.8	6.83658	2.64464		33447.9
0.350612	12	12.6152	0.628319	0.623514	0	-0.0490911	0.22752	0.241032	0.899023	0.923887	0.0290733	0.0330554	34953.8	34712.7	1690.24	2482.34	13734.7	-11252.4	11.4787	5.96004		34018.5
0.379829	13	13.6595	0.628319	0.622072	0	-0.0555951	0.252506	0.266319	0.899855	0.929714	0.0357403	0.0404799	35504.2	35296.4	2426.34	3303.24	15477.8	-12174.6	16.4777	9.54132		34590.4
0.409047	14	14.7008	0.628319	0.62044	0	-0.0622457	0.277503	0.291316	0.899794	0.935248	0.0431016	0.0486367	36055.5	35880.8	3213.81	4175.55	17268.6	-13093.1	21.8255	13.3891		35163.2
0.438265	15	15.7389	0.628319	0.618624	0	-0.0690507	0.302486	0.315969	0.898814	0.940538	0.051157	0.0575168	36607.2	36465.9	4051.36	5097.11	19104.7	-14007.5	27.5135	17.5112		35736.6
0.467482	16	16.7734	0.628319	0.616628	0	-0.0760231	0.327429	0.340225	0.896887	0.945639	0.059906	0.0671097	37159.3	37051.3	4937.55	6065.55	20983.3	-14917.8	33.5317	21.9108		36310.3
0.4967	17	17.8043	0.628319	0.614452	0	-0.0831649	0.352304	0.364029	0.89399	0.950591	0.0693469	0.0774032	37711.7	37637	5870.8	7078.46	22901.9	-15823.4	39.8696	26.5894		36884.2
0.525918	18	18.8313	0.628319	0.612089	0	-0.0904491	0.377086	0.387324	0.8901	0.955385	0.0794776	0.0883841	38264.1	38222.9	6849.42	8133.49	24857.8	-16724.3	46.5156	31.5522		37458.4
0.555135	19	19.8541	0.628319	0.60953	0	-0.0978021	0.401745	0.410049	0.8852	0.959938	0.090295	0.100037	38816.8	38809.4	7871.66	9228.68	26848.8	-17620.1	53.4578	36.8141		38033.3
0.584353	20	20.8725	0.628319	0.60676	0	-0.105091	0.426254	0.432139	0.879275	0.964053	0.101795	0.112346	39370.4	39398	8936.11	10363	28873.5	-18510.5	60.6867	42.4077		38610.1
0.613571	21	21.8862	0.628319	0.603766	0	-0.112118	0.450584	0.45353	0.872311	0.967402	0.113974	0.125293	39927.1	39991.4	10042.5	11537.1	30932.3	-19395.2	68.2002	48.3891		39191.5
0.642788	22	22.8949	0.628319	0.600535	0	-0.118623	0.474706	0.474156	0.864301	0.969512	0.126826	0.138855	40491.4	40593.4	11192.5	12752.9	33026.9	-20274.1	76.0104	54.8386		39781.6
0.672006	23	23.898	0.628319	0.597065	0	-0.124299	0.498591	0.493957	0.85524	0.969783	0.140344	0.15301	41070	41208.3	12390.7	14013.4	35160.2	-21146.8	84.1473	61.8524		40384.2
0.701223	24	24.8951	0.628319	0.593362	0	-0.128812	0.522209	0.512886	0.845126	0.967521	0.154523	0.16773	41670.8	41838.8	13643.3	15320.8	37333.8	-22013	92.6539	69.5273		41002
0.730441	25	25.8856	0.628319	0.589453	0	-0.131828	0.545533	0.530913	0.833964	0.961989	0.169353	0.182988	42300.6	42484.2	14956.7	16674.1	39546.6	-22872.5	101.573	77.9378		41634.5
0.759659	26	26.8689	0.628319	0.585381	0	-0.133048	0.568531	0.548032	0.821761	0.952473	0.184827	0.198751	42962.2	43138.9	16334.3	18067	41792	-23725.1	110.929	87.1129		42276.1
0.788876	27	27.8445	0.628319	0.581209	0	-0.132234	0.591176	0.564267	0.808528	0.93835	0.200935	0.214987	43652.4	43790.4	17773.7	19484.2	44054.6	-24570.4	120.704	97.0066		42914.6
0.818094	28	28.8118	0.628319	0.577015	0	-0.12923	0.61344	0.579674	0.79428	0.919145	0.217667	0.231663	44358.9	44417	19262.2	20898.6	46306.9	-25408.3	130.813	107.469		43528.7
0.847312	29	29.7707	0.628319	0.57289	0	-0.123981	0.635294	0.594337	0.77904	0.894583	0.235011	0.248752	45058.4	44987.4	20773.3	22268.9	48507.2	-26238.4	141.075	118.229		44087.7
0.876529	30	30.7212	0.628319	0.56893	0	-0.116541	0.656711	0.608367	0.76283	0.864615	0.252957	0.266228	45716	45464.1	22263.6	23542.2	50602.7	-27060.5	151.196	128.91		44554.8
0.905747	31	31.6638	0.628319	0.565228	0	-0.107068	0.677665	0.62189	0.745681	0.829433	0.271491	0.284074	46288.8	45810.1	23675.5	24661.7	52536	-27874.4	160.784	139.079		44893.9
0.934965	32	32.5991	0.628319	0.561869	0	-0.0958196	0.698129	0.635042	0.727624	0.789469	0.2906	0.302281	46733.9	45996.8	24945.5	25576.8	54256.5	-28679.8	169.409	148.323		45076.8
0.964182	33	33.5282	0.628319	0.558925	0	-0.083138	0.71808	0.647955	0.708696	0.745383	0.310271	0.320845	47016.9	46009.8	26015.2	26252.3	55728.7	-29476.4	176.673	156.312		45089.6
0.9934	34	34.4521	0.628319	0.556451	0	-0.0694354	0.737494	0.66075	0.68894	0.69804	0.330489	0.339767	47118.7	45850.5	26841.6	26672.5	56936.6	-30264.1	182.286	162.829		44933.5
1.02262	35	35.3722	0.628319	0.554485	0	-0.0551727	0.756347	0.673532	0.668398	0.648474	0.351238	0.359056	47037.3	45533.6	27402.2	26840.7	57883.2	-31042.5	186.093	167.776		44623
1.05184	36	36.2897	0.628319	0.553046	0	-0.0408377	0.77462	0.686381	0.647118	0.597846	0.372503	0.378719	46785.2	45083.1	27694.9	26775.1	58586.7	-31811.5	188.081	171.15		44181.5
1.08105	37	37.2057	0.628319	0.552132	0	-0.026921	0.792292	0.69935	0.625152	0.547386	0.394267	0.398766	46385.1	44527.4	27734	26503.8	59074.7	-32570.8	188.346	173.012		43636.9
1.11027	38	38.1213	0.628319	0.551726	0	-0.0138903	0.809345	0.712463	0.602553	0.498332	0.416513	0.419206	45864.8	43895.7	27544.4	26059.5	59379.8	-33320.2	187.059	173.461		43017.8
1.13949	39	39.0376	0.628319	0.551788	0	-0.00216512	0.825762	0.725714	0.579378	0.45185	0.439224	0.44005	45253	43215	27157.1	25475.7	59535.1	-34059.4	184.428	172.616		42350.7
1.16871	40	39.9555	0.628319	0.552266	0	0.00790634	0.841528	0.739064	0.555683	0.408965	0.462383	0.461305	44576.5	42509.2	26604.2	24784.2	59572.5	-34788.3	180.674	170.599		41659
1.19792	41	40.8758	0.628319	0.553089	0	0.0160666	0.856629	0.752444	0.531531	0.370496	0.48597	0.482979	43859.2	41799.1	25917	24015.4	59522	-35506.6	176.007	167.549		40963.2
1.22714	42	41.7991	0.628319	0.554174	0	0.0221614	0.871053	0.765757	0.506981	0.337002	0.509967	0.505076	43122.3	41104.7	25125.8	23200.5	59414.5	-36214	170.633	163.634		40282.6
1.25636	43	42.726	0.628319	0.555432	0	0.0261455	0.884791	0.778887	0.482096	0.308759	0.534355	0.527597	42386.5	40447.1	24262.8	22374.8	59285.2	-36910.4	164.773	159.083		39638.1
1.28558	44	43.6567	0.628319	0.556774	0	0.0280809	0.897834	0.791703	0.45694	0.285747	0.559116	0.550537	41675.2	39850.4	23366.2	21580.3	59175.9	-37595.6	158.684	154.196		39053.4
1.31479	45	44.5912	0.628319	0.558111	0	0.0281274	0.910175	0.804068	0.431574	0.267667	0.584229	0.573885	41015.5	39339.5	22482.2	20862	59131.4	-38269.3	152.68	149.321		38552.7
1.34401	46	45.5293	0.628319	0.559367	0	0.0265296	0.921809	0.815854	0.406064	0.253971	0.609674	0.59762	40436.1	38936.2	21662	20262.3	59193.6	-38931.4	147.11	144.81		38157.4
1.37323	47	46.4704	0.628319	0.560479	0	0.023599	0.932733	0.826944	0.38047	0.2439	0.635434	0.621716	39963.4	38654.3	20954.3	19811.6	59393.2	-39581.6	142.304	140.952		37881.2
1.40245	48	47.4138	0.628319	0.561399	0	0.0196958	0.942946	0.837245	0.354855	0.236531	0.661486	0.646143	39615.2	38497.6	20396.1	19524.4	59744.1	-40219.7	138.514	137.943		37727.6
1.43166	49	48.3589	0.628319	0.562096	0	0.0152087	0.952448	0.846686	0.329278	0.230824	0.687813	0.670867	39398.5	38459.1	20006.9	19397.8	60243.4	-40845.6	135.87	135.864		37689.9
1.46088	50	49.3049	0.628319	0.562556	0	0.0105369	0.96124	0.855228	0.303799	0.225682	0.714394	0.695854	39309.3	38524.4	19787.4	19414.8	60873.9	-41459.1	134.379	134.708		37753.9
1.4901	51	50.2511	0.628319	0.562781	0	0.00607033	0.969327	0.862856	0.278474	0.219999	0.741209	0.721069	39334.7	38674.1	19723.2	19549.1	61609	-42059.9	133.943	134.398		37900.6
1.51932	52	51.197	0.628319	0.562788	0	0.00217226	0.976713	0.869584	0.253358	0.212719	0.768239	0.74648	39456.9	38887.4	19789.4	19770	62417.9	-42647.9	134.394	134.823		38109.7
1.54854	53	52.1421	0.628319	0.562605	0	-0.000837826	0.983405	0.875451	0.228504	0.202896	0.795464	0.772058	39655.9	39144	19956.5	20046.3	63269.2	-43223	135.528	135.859		38361.2
1.57775	54	53.086	0.628319	0.562272	0	-0.00269927	0.989411	0.880519	0.20396	0.189744	0.822866	0.797776	39911.9	39425.9	20193.7	20349.3	64134.1	-43784.8	137.139	137.381		38637.4
1.60697	55	54.0284	0.628319	0.561842	0	-0.00322228	0.994739	0.884873	0.179774	0.172682	0.850425	0.823609	40207.2	39717.5	20472.6	20653.7	64987	-44333.3	139.033	139.268		38923.2
1.63619	56	54.9691	0.628319	0.561371	0	-0.00229588	0.999402	0.888612	0.15599	0.151365	0.878123	0.849535	40526.4	40005.4	20767.7	20936.6	65805	-44868.3	141.037	141.398		39205.3
1.66541	57	55.9081	0.628319	0.560925	0	0.000109192	1.00341	0.891848	0.132648	0.125702	0.905941	0.875535	40855.4	40276.6	21055.5	21175.4	66565.1	-45389.7	142.991	143.625		39471.1
1.69462	58	56.8454	0.628319	0.560566	0	0.00394268	1.00678	0.894696	0.109786	0.095845	0.933862	0.901597	41180.1	40516.9	21311.6	21344.9	67242.2	-45897.2	144.731	145.768		39706.6
1.72384	59	57.7813	0.628319	0.560357	0	0.00908195	1.00951	0.89727	0.0874373	0.0621778	0.961867	0.927711	41484.4	40711	21508.4	21417.5	67808.2	-46390.8	146.067	147.606		39896.8
1.75306	60	58.7162	0.628319	0.560351	0	0.0153429	1.01164	0.899674	0.0656339	0.0252774	0.98994	0.953874	41750.1	40843.6	21614.4	21365.3	68235.5	-46870.2	146.787	148.904		40026.7
1.78228	61	59.6506	0.628319	0.560592	0	0.0224934	1.01317	0.901993	0.0444031	-0.0141234	1.01806	0.980088	41958.8	40902.7	21597.4	21166.1	68501.4	-47335.3	146.671	149.447		40084.6
1.81149	62	60.5854	0.628319	0.561113	0	0.0302673	1.01411	0.904295	0.023769	-0.0551817	1.04622	1.00636	42094.8	40881.9	21430.7	20807.7	68593.7	-47786	145.54	149.083		40064.3
1.84071	63	61.5211	0.628319	0.561934	0	0.0383795	1.01449	0.906624	0.00375264	-0.0969885	1.0744	1.0327	42148.8	40781.8	21098.5	20290.4	68512.6	-48222.2	143.283	147.737		39966.2
1.86993	64	62.4587	0.628319	0.563061	0	0.0465389	1.01432	0.909003	-0.0156281	-0.138613	1.10258	1.05911	42118.6	40609.2	20598.1	19625.9	68269.5	-48643.6	139.885	145.412		39797
1.89915	65	63.3989	0.628319	0.56449	0	0.0544615	1.01363	0.911431	-0.0343587	-0.179141	1.13074	1.0856	42008.9	40375.4	19939.3	18834.1	67884.4	-49050.3	135.411	142.167		39567.9
1.92836	66	64.3422	0.628319	0.566206	0	0.0618819	1.01242	0.913892	-0.0524274	-0.217718	1.15889	1.11218	41829.6	40094	19141.1	17939.7	67381.7	-49442	129.99	138.096		39292.2
1.95758	67	65.2893	0.628319	0.568185	0	0.0685639	1.01072	0.916351	-0.0698257	-0.253582	1.18699	1.13885	41593.4	39779.4	18227.6	16968.4	66787	-49818.6	123.786	133.312		38983.8
1.9868	68	66.2406	0.628319	0.570396	0	0.07431	1.00855	0.918759	-0.0865477	-0.286095	1.21503	1.16561	41313.5	39444.6	17224.4	15944.4	66124.5	-50180.1	116.974	127.926		38655.7
2.01602	69	67.1965	0.628319	0.572798	0	0.0789692	1.00592	0.921056	-0.10259	-0.31477	1.24301	1.19246	41003	39101.4	16156.3	14889.4	65415.7	-50526.3	109.72	122.043		38319.4
2.04524	70	68.1573	0.628319	0.57535	0	0.0824425	1.00286	0.923174	-0.117952	-0.339289	1.27091	1.2194	40673.2	38759.6	15045.3	13821.9	64679	-50857.1	102.175	115.762		37984.4
2.07445	71	69.1233	0.628319	0.578001	0	0.0846862	0.999374	0.925038	-0.132636	-0.359515	1.29872	1.24642	40334	38428	13911	12758.7	63931.1	-51172.4	94.472	109.183		37659.4
2.10367	72	70.0946	0.628319	0.580704	0	0.0857121	0.995494	0.926571	-0.146645	-0.375488	1.32643	1.27351	39995	38115.4	12771.4	11716.5	63188.6	-51472.1	86.7331	102.425		37353
2.13289	73	71.0712	0.628319	0.58341	0	0.0855844	0.991233	0.9277	-0.159985	-0.387413	1.35402	1.30066	39665.9	37831.3	11645.4	10713.5	62469.7	-51756.2	79.0856	95.6267		37074.7
2.16211	74	72.053	0.628319	0.586073	0	0.0844145	0.986612	0.928358	-0.172664	-0.395649	1.3815	1.32786	39358	37586.1	10553.4	9768.75	61793.2	-52024.4	71.67	88.9491		36834.4
2.19132	75	73.0399	0.628319	0.588654	0	0.0823541	0.981647	0.928492	-0.184691	-0.400675	1.40883	1.35509	39083.6	37389.1	9517.72	8899.91	61176.8	-52276.9	64.6364	82.5529		36641.4
2.22054	76	74.0315	0.628319	0.591121	0	0.079586	0.976357	0.92806	-0.196079	-0.403069	1.43603	1.38232	38854.8	37247.3	8559.01	8119.63	60633	-52513.4	58.1257	76.5735		36502.3
2.24976	77	75.0274	0.628319	0.59345	0	0.0763157	0.97076	0.927038	-0.206838	-0.403475	1.46307	1.40954	38680.6	37163.2	7692.92	7433.23	60167.1	-52733.9	52.2439	71.1023		36419.9
2.27898	78	76.0271	0.628319	0.595626	0	0.0727611	0.964872	0.925415	-0.216983	-0.40257	1.48996	1.43673	38566	37135	6927.2	6838.2	59776.5	-52938.3	47.0438	66.1795		36392.3
2.30819	79	77.0303	0.628319	0.597643	0	0.0691424	0.95871	0.9232	-0.226529	-0.401034	1.51667	1.46385	38510.8	37157.2	6261.14	6325.56	59452.2	-53126.6	42.5205	61.8013		36414
2.33741	80	78.0365	0.628319	0.599502	0	0.0656721	0.952292	0.920411	-0.235492	-0.399515	1.54322	1.4909	38510.7	37221.8	5686.91	5882.32	59181.1	-53298.8	38.6208	57.9326		36477.3
2.36663	81	79.0454	0.628319	0.601215	0	0.0625426	0.945633	0.917081	-0.243887	-0.398593	1.56958	1.51784	38558.5	37319.8	5192.01	5493.88	58948.6	-53454.7	35.2599	54.5207		36573.4
2.39585	82	80.0567	0.628319	0.602796	0	0.0599129	0.938748	0.913254	-0.251733	-0.39874	1.59575	1.54468	38645.3	37442.4	4761.78	5146.12	58740.4	-53594.3	32.338	51.5046		36693.6
2.42506	83	81.07	0.628319	0.604271	0	0.0578933	0.931653	0.908984	-0.259048	-0.400274	1.62173	1.57138	38762.5	37581.9	4381.45	4826.64	58544.2	-53717.6	29.7552	48.8205		36830.2
2.45428	84	82.0853	0.628319	0.605668	0	0.0565287	0.924361	0.904331	-0.265849	-0.403317	1.64751	1.59794	38901.5	37731.6	4037.58	4525.28	58349.8	-53824.5	27.4199	46.4011		36977
2.4835	85	83.1024	0.628319	0.60702	0	0.0557855	0.916888	0.899359	-0.272155	-0.407758	1.67308	1.62434	39055.1	37886.5	3718.57	4233.76	58148.8	-53915.1	25.2534	44.1716		37128.7
2.51272	86	84.1211	0.628319	0.608363	0	0.0555461	0.909246	0.894136	-0.277985	-0.413247	1.69844	1.65058	39216.8	38041.6	3414.52	3944.46	57933.6	-53989.2	23.1886	42.042		37280.8
2.54194	87	85.1415	0.628319	0.609731	0	0.055616	0.901448	0.888724	-0.283359	-0.419223	1.72359	1.67664	39380.4	38191.9	3116.13	3649.12	57695.9	-54046.8	21.1621	39.9029		37428.1
2.57115	88	86.1637	0.628319	0.611157	0	0.0557467	0.893508	0.88318	-0.288295	-0.424987	1.74852	1.70254	39538.9	38331.5	2813.49	3338	57426	-54088	19.1069	37.627		37564.9
2.60037	89	87.1879	0.628319	0.612664	0	0.0556705	0.885436	0.877545	-0.292813	-0.429807	1.77323	1.72825	39684.5	38453.7	2495.41	3000.67	57113.4	-54112.8	16.9467	35.084		37684.6
2.62959	90	88.2144	0.628319	0.614261	0	0.0551416	0.877244	0.871836	-0.296932	-0.433026	1.79771	1.7538	39808.7	38552.5	2150.29	2627.75	56748.7	-54121	14.603	32.1623		37781.4
2.65881	91	89.2435	0.628319	0.615934	0	0.0539729	0.868943	0.866039	-0.300669	-0.43416	1.82196	1.77917	39903.7	38623.4	1768.07	2213.19	56325.9	-54112.8	12.0072	28.7909		37851
2.68802	92	90.2757	0.628319	0.617643	0	0.0520609	0.860544	0.860101	-0.304046	-0.432954	1.84598	1.80438	39963.9	38664.8	1342.47	1755.39	55843.4	-54088	9.11694	24.9506		37891.5
2.71724	93	91.3112	0.628319	0.619331	0	0.0493946	0.852055	0.853947	-0.307078	-0.429399	1.86977	1.82943	39987.1	38677.3	872.163	1257.22	55304	-54046.8	5.92301	20.6735		37903.8
2.74646	94	92.3504	0.628319	0.620931	0	0.0460481	0.843487	0.847496	-0.309786	-0.423713	1.89332	1.85431	39974.3	38663.9	360.68	724.928	54714.1	-53989.2	2.44944	16.0319		37890.6
2.77568	95	93.3935	0.628319	0.622389	0	0.0421606	0.834848	0.840683	-0.312186	-0.416288	1.91663	1.87903	39928.8	38628.4	-184.834	166.752	54081.8	-53915.1	-0.979807	11.1224		37855.8
2.80489	96	94.4416	0.628319	0.623665	0	0.0379109	0.826146	0.833461	-0.314296	-0.407622	1.9397	1.90361	39855.9	38575.4	-755.139	-409.052	53415.5	-53824.5	-4.00299	4.72211		37803.9
2.83411	97	95.4928	0.628319	0.624742	0	0.0334906	0.817389	0.825839	-0.316134	-0.398247	1.96253	1.92799	39761.4	38509.1	-1340.39	-992.969	52724.6	-53717.6	-7.10539	0.722821		37739
2.86333	98	96.5447	0.628319	0.625623	0	0.0290815	0.808585	0.817859	-0.317715	-0.388665	1.98511	1.95213	39651.2	38433.6	-1931.17	-1576.1	52018.2	-53594.3	-10.2372	-3.24171		37664.9
2.89255	99	97.5965	0.628319	0.626322	0	0.0248391	0.799741	0.809563	-0.319056	-0.379307	2.00745	1.97599	39530.3	38351.9	-2519.2	-2151.78	51302.9	-53454.7	-13.3543	-7.11334		37584.9
2.92176	100	98.6483	0.628319	0.626864	0	0.0208834	0.790862	0.800997	-0.320173	-0.370507	2.02954	1.99958	39403.4	38267.2	-3097.4	-2714.51	50584.3	-53298.8	-16.4193	-10.8456		37501.8
2.95098	101	99.7002	0.628319	0.627274	0	0.0172962	0.781955	0.792208	-0.321081	-0.362487	2.05138	2.0229	39274.7	38182.5	-3659.69	-3258.97	49867.7	-53126.6	-19.4	-14.3998		37418.9
2.9802	102	100.752	0.628319	0.627579	0	0.0141229	0.773026	0.783243	-0.321795	-0.355372	2.07298	2.04595	39148.2	38101.7	-4200.22	-3779.38	49158.9	-52938.3	-22.2654	-17.7412		37339.7
3.00942	103	101.804	0.628319	0.627801	0	0.0113777	0.764079	0.774141	-0.322329	-0.3492	2.09433	2.06873	39028.5	38029.3	-4712.77	-4269.38	48464.5	-52733.9	-24.9824	-20.8368		37268.7
3.03864	104	102.856	0.628319	0.62796	0	0.00905027	0.75512	0.764935	-0.322697	-0.343944	2.11543	2.09123	38921.1	37970.1	-5190.56	-4722.67	47790.7	-52513.4	-27.5152	-23.6578		37210.7
3.06785	105	103.908	0.628319	0.628073	0	0.00711301	0.746153	0.755654	-0.322913	-0.339534	2.13628	2.11345	38831.3	37928.2	-5626.98	-5134.15	47142.7	-52276.9	-29.8286	-26.1839		37169.7
3.09707	106	104.959	0.628319	0.628152	0	0.0055274	0.737182	0.74632	-0.322989	-0.33587	2.15688	2.1354	38763.8	37906.6	-6016.76	-5501	46523.4	-52024.4	-31.8949	-28.4087		37148.4
3.12629	107	106.011	0.628319	0.628206	0	0.0042495	0.72821	0.73695	-0.322938	-0.332844	2.17724	2.15707	38721.5	37905.9	-6357.12	-5823.08	45933.1	-51756.2	-33.6991	-30.3401		37147.8
3.15551	108	107.063	0.628319	0.628244	0	0.00323415	0.719242	0.727558	-0.322772	-0.330345	2.19734	2.17847	38705.4	37925.4	-6648.14	-6102.67	45369.5	-51472.1	-35.2418	-31.999		37166.9
3.18472	109	108.115	0.628319	0.628269	0	0.00243798	0.710279	0.718155	-0.322502	-0.328269	2.21719	2.1996	38713.9	37962.6	-6892.53	-6343.67	44828.7	-51172.4	-36.5373	-33.4142		37203.4
3.21394	110	109.167	0.628319	0.628286	0	0.00182126	0.701326	0.708749	-0.32214	-0.326523	2.2368	2.22044	38744.4	38014.6	-7094.73	-6550.87	44306.2	-50857.1	-37.6091	-34.6184		37254.3
3.24316	111	110.219	0.628319	0.628297	0	0.00134894	0.692384	0.699347	-0.321696	-0.32503	2.25616	2.24101	38793.1	38077.9	-7260.1	-6729.14	43797.2	-50526.3	-38.4858	-35.6438		37316.3
3.27238	112	111.27	0.628319	0.628305	0	0.000991037	0.683455	0.689953	-0.32118	-0.323725	2.27527	2.26131	38856	38149.3	-7394.13	-6883.01	43297.1	-50180.1	-39.1963	-36.5198		37386.3
3.30159	113	112.322	0.628319	0.62831	0	0.000722513	0.674541	0.680571	-0.320602	-0.322556	2.29413	2.28133	38929.4	38225.9	-7501.9	-7016.38	42802.3	-49818.6	-39.7676	-37.2715		37461.4
3.33081	114	113.374	0.628319	0.628313	0	0.000522913	0.665644	0.671205	-0.319972	-0.321483	2.31274	2.30108	39009.6	38305.3	-7587.81	-7132.55	42309.4	-49442	-40.223	-37.9201		37539.2
3.36003	115	114.426	0.628319	0.628315	0	0.000375837	0.656765	0.661856	-0.319299	-0.320478	2.33111	2.32055	39093.8	38385	-7655.6	-7234.45	41815.8	-49050.3	-40.5823	-38.4839		37617.3
3.38925	116	115.478	0.628319	0.628316	0	0.000268352	0.647905	0.652528	-0.318591	-0.319519	2.34923	2.33976	39179.1	38462.6	-7708.6	-7325.02	41318.6	-48643.6	-40.8633	-38.9809		37693.3
3.41846	117	116.53	0.628319	0.628317	0	0.000190407	0.639066	0.64322	-0.317856	-0.318593	2.3671	2.35869	39262.7	38535.1	-7750.1	-7407.47	40814.7	-48222.2	-41.0833	-39.4298		37764.4
3.44768	118	117.581	0.628319	0.628318	0	0.000134295	0.630247	0.633935	-0.317104	-0.317691	2.38473	2.37734	39341.2	38599.5	-7783.69	-7485.23	40300.8	-47786	-41.2613	-39.8503		37827.5
3.4769	119	118.633	0.628319	0.628318	0	9.41806e-05	0.621449	0.624673	-0.31634	-0.316808	2.40212	2.39573	39410.9	38652.5	-7813.13	-7561.44	39773.9	-47335.3	-41.4174	-40.2601		37879.5
3.50612	120	119.685	0.628319	0.628318	0	6.56896e-05	0.612672	0.615434	-0.315573	-0.315943	2.41926	2.41385	39468.3	38691.7	-7841.9	-7638.39	39231.8	-46870.2	-41.5699	-40.672		37917.9
3.53534	121	120.737	0.628319	0.628318	0	4.55799e-05	0.603917	0.606219	-0.314809	-0.315097	2.43615	2.43169	39510.6	38715.6	-7872.54	-7717.01	38673.7	-46390.8	-41.7323	-41.0917		37941.3
3.56455	122	121.789	0.628319	0.628318	0	3.14695e-05	0.595183	0.597026	-0.314056	-0.314274	2.45281	2.44927	39536.1	38724.3	-7906.11	-7796.83	38100.4	-45897.2	-41.9103	-41.5169		37949.8
3.59377	123	122.841	0.628319	0.628318	0	2.16242e-05	0.586469	0.587857	-0.31332	-0.313476	2.46922	2.46658	39544.8	38718.6	-7942.17	-7876.19	37513.5	-45389.7	-42.1014	-41.9393		37944.3
3.62299	124	123.892	0.628319	0.628318	0	1.47914e-05	0.577776	0.578711	-0.312606	-0.312708	2.48539	2.48362	39537.8	38700.6	-7979.03	-7952.77	36915.6	-44868.3	-42.2968	-42.3466		37926.6
3.65221	125	124.944	0.628319	0.628318	0	1.00735e-05	0.569102	0.569585	-0.311921	-0.311976	2.50132	2.5004	39517	38672.4	-8014.22	-8023.93	36309.4	-44333.3	-42.4834	-42.7251		37899
3.68142	126	125.996	0.628319	0.628318	0	6.83181e-06	0.560447	0.560481	-0.31127	-0.311285	2.51701	2.51691	39485.1	38636.4	-8044.97	-8087.15	35697.7	-43784.8	-42.6464	-43.0613		37863.7
3.71064	127	127.048	0.628319	0.628319	0	4.61469e-06	0.551809	0.551396	-0.310659	-0.310639	2.53245	2.53315	39444.6	38594.8	-8068.58	-8140.2	35082.8	-43223	-42.7715	-43.3434		37822.9
3.73986	128	128.1	0.628319	0.628319	0	3.10507e-06	0.543188	0.542329	-0.310094	-0.310045	2.54766	2.54913	39397.8	38549.5	-8082.66	-8181.24	34466.7	-42647.9	-42.8462	-43.5619		37778.5
3.76908	129	129.152	0.628319	0.628319	0	2.08155e-06	0.534581	0.533278	-0.309578	-0.309508	2.56263	2.56484	39347	38502.2	-8085.26	-8208.81	33851.1	-42059.9	-42.86	-43.7089		37732.2
3.79829	130	130.203	0.628319	0.628319	0	1.39044e-06	0.525988	0.524242	-0.309118	-0.309033	2.57736	2.58029	39294.1	38454.6	-8074.78	-8221.62	33237.5	-41459.1	-42.8044	-43.7775		37685.5
3.82751	131	131.255	0.628319	0.628319	0	9.25597e-07	0.517407	0.515219	-0.308717	-0.308626	2.59185	2.59548	39240.8	38408.3	-8049.81	-8218.37	32627.3	-40845.6	-42.672	-43.7611		37640.1
3.85673	132	132.307	0.628319	0.628319	0	6.14121e-07	0.508837	0.506207	-0.30838	-0.308291	2.60611	2.6104	39189	38365.5	-8008.94	-8197.66	32022.1	-40219.7	-42.4554	-43.6519		37598.2
3.88595	133	133.359	0.628319	0.628319	0	4.06163e-07	0.500275	0.497203	-0.308111	-0.308033	2.62012	2.62506	39141.1	38328.3	-7950.62	-8158.06	31423.5	-39581.6	-42.1462	-43.4426		37561.7
3.91516	134	134.411	0.628319	0.628319	0	2.67799e-07	0.491719	0.488206	-0.307915	-0.307857	2.6339	2.63945	39099.5	38298.7	-7873.26	-8098.44	30832.9	-38931.4	-41.7362	-43.127		37532.7
3.94438	135	135.463	0.628319	0.628319	0	1.76046e-07	0.483167	0.479213	-0.307796	-0.307768	2.64744	2.65358	39066.5	38278.3	-7775.62	-8018.3	30251	-38269.3	-41.2185	-42.7025		37512.8
3.9736	136	136.514	0.628319	0.628319	0	1.15398e-07	0.474618	0.470221	-0.307757	-0.307769	2.66074	2.66746	39043.7	38267.7	-7657.07	-7917.89	29677.7	-37595.6	-40.5901	-42.1705		37502.4
4.00282	137	137.566	0.628319	0.628319	0	7.54338e-08	0.466069	0.461227	-0.307801	-0.307866	2.67381	2.68106	39031.8	38266.7	-7517.84	-7798.24	29112.2	-36910.4	-39.8521	-41.5364		37501.4
4.03204	138	138.618	0.628319	0.628319	0	4.91779e-08	0.457517	0.452229	-0.307934	-0.308061	2.68663	2.69441	39030.5	38274.3	-7358.95	-7660.89	28553.1	-36214	-39.0098	-40.8084		37508.8
4.06125	139	139.67	0.628319	0.628319	0	3.19779e-08	0.448961	0.443224	-0.308157	-0.30836	2.69922	2.70749	39039	38289.2	-7182.02	-7507.73	27998.8	-35506.6	-38.0719	-39.9965		37523.4
4.09047	140	140.722	0.628319	0.628319	0	2.07415e-08	0.440397	0.434209	-0.308475	-0.308765	2.71158	2.72031	39055.6	38309.9	-6988.98	-7340.68	27447.6	-34788.3	-37.0486	-39.1111		37543.7
4.11969	141	141.774	0.628319	0.628319	0	1.34207e-08	0.431822	0.425181	-0.30889	-0.309281	2.72369	2.73286	39078.6	38334.7	-6781.88	-7161.61	26897.8	-34059.5	-35.9508	-38.1619		37568
4.14891	142	142.825	0.628319	0.628319	0	8.66343e-09	0.423235	0.416135	-0.309406	-0.30991	2.73557	2.74515	39106.3	38362.2	-6562.65	-6972.18	26348	-33320.2	-34.7886	-37.1578		37594.9
4.17812	143	143.877	0.628319	0.628319	0	5.57975e-09	0.414632	0.40707	-0.310026	-0.310657	2.7472	2.75718	39137.2	38391.2	-6333.01	-6773.85	25797	-32570.8	-33.5713	-36.1067		37623.3
4.20734	144	144.929	0.628319	0.628319	0	3.58575e-09	0.40601	0.397981	-0.310752	-0.311524	2.7586	2.76894	39169.7	38420.5	-6094.5	-6567.92	25243.6	-31811.5	-32.3069	-35.0154		37652.1
4.23656	145	145.981	0.628319	0.628319	0	2.2994e-09	0.397367	0.388865	-0.311587	-0.312514	2.76976	2.78043	39202.7	38449.1	-5848.44	-6355.62	24686.9	-31042.5	-31.0026	-33.8904		37680.1
4.26578	146	147.033	0.628319	0.628319	0	1.47146e-09	0.388699	0.379718	-0.312533	-0.313631	2.78068	2.79166	39235	38475.7	-5596.12	-6138.22	24125.9	-30264.1	-29.665	-32.7384		37706.2
4.29499	147	148.085	0.628319	0.628319	0	9.39713e-10	0.380003	0.370536	-0.313594	-0.314877	2.79135	2.80262	39265.1	38498.8	-5338.83	-5917	23559.4	-29476.4	-28.3011	-31.5664		37728.8
4.32421	148	149.136	0.628319	0.628319	0	5.99018e-10	0.371276	0.361317	-0.314771	-0.316254	2.80179	2.81331	39291.6	38517.1	-5077.92	-5693.23	22986.5	-28679.8	-26.9181	-30.381		37746.7
4.35343	149	150.188	0.628319	0.628319	0	3.80867e-10	0.362515	0.352055	-0.316068	-0.317765	2.81198	2.82374	39312.6	38529.1	-4814.71	-5467.97	22406.4	-27874.4	-25.5228	-29.1878		37758.5
4.38265	150	151.24	0.628319	0.628319	0	2.42647e-10	0.353716	0.342746	-0.317484	-0.319412	2.82193	2.83389	39326.9	38534.1	-4550.28	-5241.92	21818.6	-27060.5	-24.121	-27.9905		37763.4
4.41186	151	152.292	0.628319	0.628319	0	1.50828e-10	0.344876	0.333388	-0.319024	-0.321198	2.83163	2.84376	39333.5	38531.7	-4285.35	-5015.39	21223	-26238.4	-22.7167	-26.791		37761
4.44108	152	153.344	0.628319	0.628319	0	1.06537e-10	0.335991	0.323976	-0.320689	-0.323124	2.84109	2.85337	39332	38522.2	-4020.22	-4788.38	20619.9	-25408.3	-21.3112	-25.5889		37751.8
4.4703	153	154.396	0.628319	0.628319	0	2.58745e-11	0.327058	0.314505	-0.322479	-0.325192	2.8503	2.86269	39322.8	38506.5	-3754.8	-4560.65	20009.8	-24570.4	-19.9042	-24.3832		37736.3
4.49952	154	155.447	0.628319	0.628319	0	-2.72622e-09	0.318074	0.304972	-0.324398	-0.327403	2.85926	2.87174	39306.7	38485.3	-3488.8	-4331.9	19393.2	-23725.1	-18.4941	-23.1722		37715.6
4.52874	155	156.499	0.628319	0.628319	0	-2.96058e-08	0.309035	0.295372	-0.326445	-0.329759	2.86797	2.88052	39284.6	38459.8	-3221.8	-4101.82	18770.7	-22872.5	-17.0788	-21.9542		37690.6
4.55795	156	157.551	0.628319	0.628319	0	-1.84561e-07	0.299937	0.285701	-0.328623	-0.33226	2.87642	2.889	39257.9	38430.9	-2953.43	-3870.21	18142.8	-22013	-15.6561	-20.7283		37662.3
4.58717	157	158.603	0.628319	0.628319	0	-8.32708e-07	0.290777	0.275955	-0.330932	-0.334908	2.88463	2.89721	39227.6	38399.7	-2683.38	-3636.99	17509.8	-21146.8	-14.2246	-19.4939		37631.7
4.61639	158	159.655	0.628319	0.628319	0	-2.98084e-06	0.281551	0.266129	-0.333373	-0.337701	2.89258	2.90513	39194.7	38366.8	-2411.48	-3402.17	16871.9	-20274.1	-12.7832	-18.2511		37599.5
4.64561	159	160.707	0.628319	0.628319	0	-8.90718e-06	0.272255	0.256219	-0.335946	-0.340637	2.90027	2.91276	39160.1	38333.1	-2137.68	-3165.88	16229.4	-19395.2	-11.3318	-17.0006		37566.5
4.67482	160	161.758	0.628319	0.628319	0	-2.2956e-05	0.262886	0.246222	-0.338652	-0.343715	2.9077	2.9201	39124.6	38299.3	-1862.02	-2928.29	15582.2	-18510.5	-9.87056	-15.743		37533.3
4.70404	161	162.81	0.628319	0.628319	0	-5.22307e-05	0.25344	0.236132	-0.341491	-0.346929	2.91487	2.92715	39089.1	38266.3	-1584.58	-2689.58	14930.5	-17620.1	-8.39987	-14.4793		37501
4.73326	162	163.862	0.628319	0.628319	0	-0.000106808	0.243913	0.225945	-0.344463	-0.350271	2.92178	2.9339	39054.4	38235	-1305.45	-2449.99	14274.3	-16724.3	-6.9202	-13.2104		37470.3
4.76248	163	164.914	0.628319	0.628319	0	-0.000199192	0.234302	0.215658	-0.347567	-0.353735	2.92842	2.94035	39021.7	38206.4	-1024.74	-2209.84	13613.6	-15823.5	-5.43212	-11.9375		37442.3
4.79169	164	165.966	0.628319	0.628318	0	-0.000343059	0.224603	0.205265	-0.350802	-0.357314	2.9348	2.9465	38992.1	38181.3	-742.607	-1969.58	12948.2	-14917.8	-3.93656	-10.6629		37417.7
4.82091	165	167.018	0.628319	0.628318	0	-0.000551733	0.214812	0.194763	-0.354167	-0.361003	2.9409	2.95234	38966.3	38160.2	-459.39	-1729.83	12277.7	-14007.5	-2.43522	-9.38953		37397
4.85013	166	168.069	0.628319	0.628315	0	-0.000837036	0.204925	0.184148	-0.35766	-0.364796	2.94673	2.95788	38944.8	38143.1	-175.591	-1491.37	11601.7	-13093.1	-0.930808	-8.12199		37380.3
4.87935	167	169.121	0.628319	0.628309	0	-0.00120902	0.19494	0.173414	-0.361281	-0.36869	2.95229	2.9631	38927.9	38129.8	108.105	-1255.06	10919.5	-12174.6	0.734161	-6.86623		37367.2
4.90856	168	170.173	0.628319	0.628293	0	-0.00167659	0.184853	0.162557	-0.365025	-0.372681	2.95756	2.96801	38915	38119.7	390.888	-1021.83	10230.6	-11252.4	2.65459	-5.63022		37357.3
4.93778	169	171.225	0.628319	0.628265	0	-0.00224846	0.17466	0.151572	-0.368892	-0.376764	2.96255	2.9726	38905.7	38112.2	671.888	-792.585	9534.19	-10326.8	4.5629	-4.42422		37350
4.967	170	172.277	0.628319	0.628219	0	-0.00293372	0.164358	0.140456	-0.372876	-0.380938	2.96726	2.97687	38899.3	38106.6	950.234	-568.185	8829.83	-9398.02	6.4532	-3.26104		37344.5
4.99622	171	173.329	0.628319	0.628152	0	-0.00374129	0.153944	0.129206	-0.376976	-0.385201	2.97168	2.98081	38895	38102.2	1225.1	-349.428	8116.96	-8466.39	8.31987	-2.15559		37340.2
5.02544	172	174.38	0.628319	0.628063	0	-0.00467802	0.143414	0.117818	-0.381187	-0.389554	2.97581	2.98442	38892	38086.4	1495.73	-139.528	7392.66	-7532.19	10.1578	-1.13688		37324.6
5.05465	173	175.432	0.628319	0.627949	0	-0.00574608	0.132766	0.106291	-0.385504	-0.394002	2.97965	2.98769	38889.8	38021.9	1761.44	54.8275	6650.52	-6595.69	11.9623	-0.32239		37261.4
5.08387	174	176.484	0.628319	0.627806	0	-0.00694041	0.121996	0.0946282	-0.389921	-0.398546	2.98319	2.99063	38887.8	37827.3	2021.62	223.027	5880.22	-5657.19	13.7292	0.555911		37070.8
5.11309	175	177.535	0.628319	0.62763	0	-0.00824735	0.111102	0.0828276	-0.394435	-0.40319	2.98643	2.99322	38873.1	37418.9	2273.35	360.673	5077.63	-4716.96	15.4387	1.14367		36670.6
5.14231	176	178.585	0.628319	0.627415	0	-0.00964508	0.100082	0.0708865	-0.399037	-0.407936	2.98936	2.99547	38807.9	36751.6	2510.42	475.25	4250.54	-3775.29	17.0487	1.49474		36016.6
5.17152	177	179.636	0.628319	0.627155	0	-0.0111059	0.088933	0.058804	-0.403721	-0.41278	2.99199	2.99737	38608.9	35899.7	2722.67	590.809	3423.29	-2832.48	18.4901	1.7809		35181.7
5.20074	178	180.686	0.628319	0.626844	0	-0.0125999	0.0776526	0.0465819	-0.40848	-0.417716	2.9943	2.99891	38190.8	35012.1	2906.09	731.664	2620.46	-1888.8	19.7357	2.18007		34311.9
5.22996	179	181.735	0.628319	0.626479	0	-0.0140992	0.0662391	0.034224	-0.413305	-0.422735	2.9963	3.00009	37507.7	34275.7	3068.06	911.876	1856.42	-944.545	20.8357	2.80322		33590.1
5.25918	180	182.784	0.628319	0.626062	0	-0.0155809	0.0546907	0.0217347	-0.418188	-0.427826	2.99798	3.00091	36635.7	33793.8	3231.35	1126.06	1126.07	-0.00290033	21.9447	3.6311		33117.9
5.28839	181	183.833	0.628319	0.625596	0	-0.0170301	0.043006	0.00911806	-0.423119	-0.432978	2.99934	3.00136	35727.6	33593.7	3418.61	1358.18	413.637	944.539	23.2163	4.5718		32921.9
5.31761	182	184.88	0.628319	0.625085	0	-0.0184403	0.0311837	-0.00362035	-0.428087	-0.43818	3.00037	3.00144	34974.3	33611.5	3642.49	1617.06	-271.733	1888.79	24.7368	5.75895		32939.3
5.34683	183	185.926	0.628319	0.624535	0	-0.0198124	0.0192231	-0.0164736	-0.433083	-0.443416	3.00107	3.00114	34482.2	33765.4	3897.3	1933.11	-899.36	2832.47	26.4673	7.30758		33090.1
5.37605	184	186.971	0.628319	0.62395	0	-0.0211534	0.00712341	-0.0294389	-0.438095	-0.448675	3.00143	3.00047	34279.6	33964.8	4167.39	2233.87	-1541.42	3775.29	28.3015	8.78466		33285.5
5.40526	185	188.015	0.628319	0.623333	0	-0.0224741	-0.00511556	-0.0425131	-0.44311	-0.453944	3.00146	2.99942	34301.3	34146.7	4473.26	2520.29	-2196.66	4716.95	30.3787	10.2013		33463.8
5.43448	186	189.057	0.628319	0.622685	0	-0.0237865	-0.0174937	-0.0556922	-0.448116	-0.459207	3.00115	2.99799	34464.4	34266.5	4819.64	2796.85	-2860.34	5657.18	32.731	11.589		33581.1
5.4637	187	190.099	0.628319	0.622006	0	-0.0251019	-0.0300107	-0.0689714	-0.4531	-0.46445	3.00049	2.99617	34676	34304.7	5149.54	3069.03	-3526.66	6595.69	34.9714	12.9839		33618.6
5.49292	188	191.139	0.628319	0.621294	0	-0.0264294	-0.0426656	-0.082345	-0.458047	-0.469658	2.99948	2.99396	34871.7	34255.5	5463.97	3342.36	-4189.83	7532.18	37.1068	14.4203		33570.4
5.52214	189	192.179	0.628319	0.620548	0	-0.027775	-0.0554573	-0.095806	-0.462942	-0.474814	2.99812	2.99136	35005.8	34124.7	5767.25	3621.31	-4845.08	8466.39	39.1664	15.9245		33442.2
5.55135	190	193.217	0.628319	0.619766	0	-0.0291411	-0.068384	-0.109347	-0.467771	-0.4799	2.9964	2.98836	35058.1	33922.4	6064.63	3909.26	-5488.75	9398.01	41.1859	17.5148		33244
5.58057	191	194.253	0.628319	0.618946	0	-0.0305266	-0.0814438	-0.122959	-0.472518	-0.484899	2.99432	2.98497	35022.4	33661.2	6361.34	4208.45	-6118.32	10326.8	43.2009	19.2019		32988
5.60979	192	195.289	0.628319	0.618086	0	-0.0319273	-0.0946341	-0.136633	-0.477167	-0.489792	2.99187	2.98118	34904.2	33353.1	6661.58	4520.23	-6732.16	11252.4	45.24	20.9906		32686
5.63901	193	196.323	0.628319	0.617185	0	-0.0333367	-0.107952	-0.150359	-0.481701	-0.494558	2.98906	2.97698	34713.8	33008.9	6968.49	4845.31	-7329.26	12174.6	47.3242	22.8821		32348.7
5.66822	194	197.355	0.628319	0.616242	0	-0.0347464	-0.121394	-0.164126	-0.486104	-0.499176	2.98587	2.97239	34463.7	32637.7	7284.08	5183.98	-7909.08	13093.1	49.4674	24.8752		31985
5.69744	195	198.385	0.628319	0.615258	0	-0.0361479	-0.134956	-0.177924	-0.490358	-0.503623	2.98231	2.9674	34166.1	32246.8	7609.51	5536.28	-8471.27	14007.5	51.6775	26.9676		31601.9
5.72666	196	199.414	0.628319	0.614231	0	-0.0375334	-0.148635	-0.191742	-0.494447	-0.50788	2.97837	2.962	33832	31841.7	7945.33	5902.14	-9015.63	14917.8	53.9581	29.1568		31204.8
5.75588	197	200.441	0.628319	0.613164	0	-0.0388979	-0.162424	-0.205568	-0.498353	-0.511925	2.97405	2.95619	33470.5	31426.4	8291.67	6281.45	-9541.99	15823.4	56.3101	31.4402		30797.9
5.78509	198	201.466	0.628319	0.612058	0	-0.0402411	-0.176319	-0.21939	-0.502058	-0.515743	2.96935	2.94999	33089	31004.2	8648.45	6674.11	-10050.2	16724.3	58.7331	33.8152		30384.1
5.81431	199	202.49	0.628319	0.610913	0	-0.0415691	-0.190314	-0.233198	-0.505545	-0.519325	2.96426	2.94338	32693.1	30577.1	9015.51	7080	-10540.1	17620.1	61.2259	36.2788		29965.5
5.84353	200	203.511	0.628319	0.609732	0	-0.0428957	-0.204403	-0.246978	-0.508798	-0.522671	2.95878	2.93637	32286.9	30146.7	9392.65	7499.02	-11011.4	18510.5	63.7871	38.8273		29543.7
5.87275	201	204.53	0.628319	0.608516	0	-0.0442435	-0.218578	-0.26072	-0.5118	-0.525791	2.9529	2.92895	31873.7	29714	9779.71	7931.08	-11464.1	19395.2	66.4157	41.4557		29119.7
5.90196	202	205.547	0.628319	0.607268	0	-0.0456429	-0.232834	-0.274412	-0.514533	-0.528709	2.94663	2.92114	31455.4	29279.9	10176.6	8376.08	-11898	20274.1	69.1109	44.1573		28694.3
5.93118	203	206.562	0.628319	0.605988	0	-0.0471291	-0.247161	-0.288041	-0.516983	-0.531459	2.93996	2.91293	31033.9	28844.7	10583.2	8833.92	-12312.8	21146.8	71.8723	46.9243		28267.8
5.9604	204	207.575	0.628319	0.604675	0	-0.0487377	-0.261552	-0.301594	-0.519134	-0.53408	2.9329	2.90432	30610	28409	10999.6	9304.49	-12708.5	22013	74.7001	49.7479		27840.8
5.98962	205	208.585	0.628319	0.603328	0	-0.0504979	-0.275999	-0.315058	-0.520972	-0.53661	2.92543	2.89532	30184.7	27972.7	11425.8	9787.76	-13084.8	22872.5	77.5945	52.6194		27413.3
6.01884	206	209.593	0.628319	0.601942	0	-0.0524245	-0.290492	-0.328417	-0.522483	-0.539075	2.91757	2.88592	29758.3	27536.2	11861.9	10283.8	-13441.3	23725.1	80.5561	55.5329		26985.4
6.04805	207	210.599	0.628319	0.600509	0	-0.0545102	-0.305022	-0.341653	-0.523653	-0.541475	2.90929	2.87614	29331.3	27098.8	12308	10793	-13777.5	24570.4	83.5857	58.4878		26556.8
6.07727	208	211.602	0.628319	0.599019	0	-0.0567188	-0.319581	-0.354747	-0.524473	-0.543773	2.90062	2.86597	28903.9	26659.3	12764.2	11316.4	-14091.9	25408.3	86.6841	61.4944		26126.1
6.10649	209	212.603	0.628319	0.597461	0	-0.0589814	-0.334156	-0.367677	-0.52493	-0.545883	2.89154	2.85543	28476.1	26214.8	13230.7	11856.4	-14382	26238.4	89.8522	64.5776		25690.5
6.13571	210	213.602	0.628319	0.595825	0	-0.0611977	-0.34874	-0.380421	-0.525015	-0.54767	2.88206	2.8445	28048.1	25760.7	13707.7	12416.5	-14644	27060.5	93.0915	67.7804		25245.5
6.16492	211	214.598	0.628319	0.594103	0	-0.0632403	-0.36332	-0.392956	-0.524721	-0.54895	2.87217	2.8332	27619.2	25292.1	14195.6	13001.3	-14873	27874.4	96.4051	71.1599		24786.3
6.19414	212	215.591	0.628319	0.59229	0	-0.0649645	-0.377887	-0.405263	-0.52404	-0.549501	2.86187	2.82154	27187.5	24804.8	14695.8	13615.3	-15064.5	28679.8	99.8015	74.7805		24308.7
6.22336	213	216.581	0.628319	0.590391	0	-0.0662205	-0.39243	-0.417325	-0.522967	-0.549083	2.85117	2.80953	26749.2	24297	15210.6	14261.3	-15215.1	29476.4	103.298	78.7014		23811.1
6.25258	214	217.567	0.628319	0.588419	0	-0.0668677	-0.406938	-0.429134	-0.521498	-0.547455	2.84007	2.79716	26298.2	23771.7	15744.4	14939.7	-15324.4	30264.1	106.923	82.9638		23296.3
6.28179	215	218.55	0.628319	0.586393	0	-0.0667875	-0.421399	-0.440689	-0.51963	-0.544402	2.82857	2.78446	25827.5	23237.5	16302.4	15645.6	-15396.9	31042.5	110.712	87.5746		22772.7
6.31101	216	219.529	0.628319	0.584344	0	-0.0658946	-0.435802	-0.451998	-0.517363	-0.539753	2.81666	2.77143	25330.8	22710.9	16889.9	16367.8	-15443.7	31811.5	114.702	92.4902		22256.7
6.34023	217	220.504	0.628319	0.582306	0	-0.0641446	-0.450137	-0.463079	-0.514696	-0.533397	2.80435	2.75808	24805.1	22216.4	17510.7	17087.3	-15483.6	32570.8	118.918	97.606		21772.1
6.36945	218	221.475	0.628319	0.580318	0	-0.0615381	-0.464393	-0.473957	-0.511632	-0.525295	2.79165	2.74442	24252.4	21784	18165.1	17778.5	-15541.7	33320.2	123.362	102.763		21348.3
6.39866	219	222.442	0.628319	0.578417	0	-0.058121	-0.478558	-0.484663	-0.508174	-0.515484	2.77856	2.73046	23682	21443.5	18848.2	18413.2	-15646.2	34059.4	128.001	107.77		21014.7
6.42788	220	223.406	0.628319	0.576639	0	-0.0539822	-0.492621	-0.49523	-0.504327	-0.504079	2.76507	2.71619	23112.2	21218.7	19547.6	18965.8	-15822.5	34788.3	132.751	112.445		20794.3
6.4571	221	224.366	0.628319	0.575015	0	-0.0492488	-0.506572	-0.505692	-0.500096	-0.49127	2.75119	2.70163	22570.5	21122.4	20242.6	19417.5	-16089	35506.6	137.471	116.64		20700
6.48632	222	225.323	0.628319	0.573567	0	-0.0440801	-0.520401	-0.516081	-0.495489	-0.477313	2.73693	2.68676	22090.8	21155.4	20905.1	19759.1	-16454.9	36214	141.97	120.26		20732.3
6.51553	223	226.278	0.628319	0.572314	0	-0.03866	-0.534096	-0.526423	-0.490515	-0.46253	2.72228	2.6716	21707.1	21308.2	21504.1	19990.4	-16920	36910.4	146.038	123.263		20882
6.54475	224	227.231	0.628319	0.571264	0	-0.0331883	-0.547648	-0.536739	-0.485184	-0.447285	2.70725	2.65613	21446.6	21564	22011.8	20118.2	-17477.4	37595.6	149.486	125.649		21132.8
6.57397	225	228.183	0.628319	0.570418	0	-0.027871	-0.561047	-0.547044	-0.479505	-0.431979	2.69186	2.64036	21324.7	21902.7	22407.7	20154.3	-18115	38269.3	152.174	127.446		21464.7
6.60319	226	229.134	0.628319	0.569771	0	-0.0229092	-0.574284	-0.557342	-0.473492	-0.417022	2.67609	2.62429	21343.4	22303.3	22681.9	20112.6	-18818.8	38931.4	154.037	128.692		21857.3
6.63241	227	230.084	0.628319	0.569309	0	-0.0184878	-0.58735	-0.567632	-0.467157	-0.402812	2.65995	2.60791	21493.2	22746.3	22834.5	20007.4	-19574.2	39581.6	155.073	129.431		22291.4
6.66162	228	231.034	0.628319	0.56901	0	-0.0147654	-0.600235	-0.5779	-0.460513	-0.389712	2.64346	2.59123	21756.7	23214.4	22873.4	19852.6	-20367.1	40219.7	155.337	129.704		22750.1
6.69084	229	231.984	0.628319	0.568845	0	-0.011864	-0.612931	-0.588125	-0.453574	-0.378022	2.62661	2.57424	22112.6	23692.3	22811.8	19661.6	-21184.1	40845.6	154.919	129.556		23218.5
6.72006	230	232.934	0.628319	0.568781	0	-0.00986323	-0.625431	-0.598276	-0.446356	-0.367963	2.60941	2.55694	22538.7	24165.3	22665.3	19448.6	-22010.5	41459.1	153.924	129.046		23682
6.74928	231	233.885	0.628319	0.568778	0	-0.00879616	-0.637726	-0.608313	-0.438873	-0.359663	2.59186	2.53933	23014.2	24616.8	22450.1	19230.6	-22829.3	42059.9	152.463	128.263		24124.5
6.77849	232	234.837	0.628319	0.568797	0	-0.00864911	-0.64981	-0.618193	-0.431141	-0.353152	2.57398	2.52142	23520.7	25028	22181.6	19028.8	-23619.1	42647.9	150.639	127.337		24527.5
6.80771	233	235.789	0.628319	0.568798	0	-0.00936441	-0.661676	-0.627869	-0.423175	-0.348364	2.55577	2.50321	24041.9	25379	21874.7	18866.7	-24356.3	43223	148.555	126.424		24871.4
6.83693	234	236.742	0.628319	0.568746	0	-0.0108454	-0.673318	-0.637294	-0.414993	-0.34514	2.53722	2.48471	24561.7	25651.8	21545.1	18767.1	-25017.7	43784.8	146.317	125.691		25138.8
6.86615	235	237.696	0.628319	0.568611	0	-0.0129628	-0.684729	-0.646427	-0.406609	-0.343245	2.51836	2.46593	25062.2	25834.5	21211.7	18747.6	-25585.7	44333.3	144.052	125.277		25317.8
6.89536	236	238.649	0.628319	0.56837	0	-0.0155623	-0.695905	-0.655228	-0.398039	-0.342374	2.49918	2.44688	25522.3	25923	20897.5	18817.9	-26050.4	44868.3	141.919	125.279		25404.5
6.92458	237	239.602	0.628319	0.568007	0	-0.018472	-0.706841	-0.66367	-0.3893	-0.342172	2.4797	2.42758	25919.7	25921.1	20628.6	18979	-26410.6	45389.7	140.092	125.743		25402.7
6.9538	238	240.554	0.628319	0.567513	0	-0.0215104	-0.717532	-0.671729	-0.380406	-0.342243	2.45992	2.40803	26234.1	25838.7	20429.7	19224.9	-26672.3	45897.2	138.742	126.671		25321.9
6.98302	239	241.506	0.628319	0.566886	0	-0.0244944	-0.727973	-0.679395	-0.371374	-0.342175	2.43984	2.38826	26451.7	25689.4	20320.3	19544.1	-26846.6	46390.7	137.998	128.036		25175.6
7.01223	240	242.455	0.628319	0.566132	0	-0.0272471	-0.738162	-0.686663	-0.362217	-0.341555	2.41948	2.36827	26567.2	25488.2	20310.7	19923	-26947.1	46870.2	137.933	129.792		24978.5
7.04145	241	243.404	0.628319	0.56526	0	-0.0296067	-0.748096	-0.693539	-0.352951	-0.339991	2.39883	2.34808	26583.8	25250	20401.9	20347	-26988.2	47335.3	138.553	131.891		24745
7.07067	242	244.35	0.628319	0.564288	0	-0.0314339	-0.75777	-0.700038	-0.34359	-0.337135	2.37792	2.3277	26511.7	24987.8	20587.1	20802.4	-26983.6	47786	139.81	134.286		24488.1
7.09989	243	245.294	0.628319	0.563238	0	-0.0326188	-0.767183	-0.706184	-0.334146	-0.332701	2.35674	2.30715	26365	24713.4	20853.7	21276.3	-26945.9	48222.2	141.621	136.93		24219.1
7.12911	244	246.236	0.628319	0.562138	0	-0.0330863	-0.776333	-0.712008	-0.324633	-0.326484	2.3353	2.28643	26159.5	24436.8	21186.7	21756.8	-26886.9	48643.6	143.883	139.778		23948.1
7.15832	245	247.176	0.628319	0.561018	0	-0.032799	-0.785218	-0.717549	-0.315064	-0.318371	2.31361	2.26555	25910.5	24168.5	21570.2	22231.1	-26819.1	49050.3	146.487	142.768		23685.2
7.18754	246	248.113	0.628319	0.559909	0	-0.0317576	-0.793836	-0.722849	-0.305448	-0.308342	2.29168	2.24453	25632.1	23919.9	21989	22684.7	-26757.3	49442	149.331	145.814		23441.5
7.21676	247	249.048	0.628319	0.558845	0	-0.029999	-0.802187	-0.727954	-0.295799	-0.296471	2.26951	2.22337	25336.5	23703.5	22429.5	23100.3	-26718.4	49818.6	152.322	148.806		23229.4
7.24598	248	249.981	0.628319	0.557853	0	-0.0275923	-0.810269	-0.732908	-0.286126	-0.282918	2.24712	2.20207	25034.6	23532.3	22878.5	23460.2	-26719.9	50180.1	155.372	151.619		23061.6
7.27519	249	250.912	0.628319	0.556961	0	-0.0246333	-0.818083	-0.737749	-0.276438	-0.267915	2.2245	2.18064	24737.5	23416.6	23322.4	23749	-26777.4	50526.3	158.387	154.131		22948.3
7.30441	250	251.841	0.628319	0.556188	0	-0.0212384	-0.825627	-0.742515	-0.266745	-0.251753	2.20167	2.15908	24458	23362.7	23745.2	23956.1	-26901	50857.1	161.258	156.252		22895.4
7.33363	251	252.769	0.628319	0.555549	0	-0.0175385	-0.832902	-0.747231	-0.257056	-0.234767	2.17863	2.13738	24210.3	23371.4	24128.1	24077.8	-27094.6	51172.4	163.858	157.925		22904
7.36285	252	253.695	0.628319	0.555052	0	-0.0136724	-0.839908	-0.751919	-0.247376	-0.21732	2.1554	2.11554	24008.8	23438.6	24451.9	24116.7	-27355.4	51472.1	166.057	159.136		22969.9
7.39206	253	254.622	0.628319	0.554701	0	-0.00978068	-0.846645	-0.75659	-0.237715	-0.199785	2.13197	2.09356	23865.8	23556.8	24699.4	24080.3	-27675.9	51756.2	167.738	159.9		23085.6
7.42128	254	255.548	0.628319	0.554494	0	-0.00599999	-0.853114	-0.761248	-0.228077	-0.182534	2.10837	2.07145	23788.6	23716.3	24859.1	23979	-28045.4	52024.4	168.823	160.249		23241.9
7.4505	255	256.474	0.628319	0.554424	0	-0.00245679	-0.859316	-0.765891	-0.218468	-0.165917	2.08458	2.04919	23779	23906.9	24926.9	23824.5	-28452.3	52276.9	169.283	160.227		23428.8
7.47972	256	257.4	0.628319	0.55448	0	0.000738057	-0.865252	-0.770508	-0.208895	-0.150245	2.06063	2.02679	23833.3	24119.2	24905.5	23628.3	-28885.1	52513.4	169.138	159.875		23636.8
7.50893	257	258.327	0.628319	0.554646	0	0.00349443	-0.870922	-0.775084	-0.19936	-0.135778	2.03651	2.00425	23943.8	24344.5	24803	23400.8	-29333	52733.9	168.442	159.234		23857.6
7.53815	258	259.254	0.628319	0.554905	0	0.00574697	-0.876328	-0.779595	-0.189868	-0.122709	2.01225	1.98157	24100.8	24575.4	24630.7	23151.5	-29786.8	52938.3	167.272	158.339		24083.9
7.56737	259	260.182	0.628319	0.555234	0	0.00745774	-0.881471	-0.784015	-0.180422	-0.111156	1.98783	1.95875	24293.8	24805.1	24401.3	22889.4	-30237.3	53126.6	165.713	157.231		24309
7.59659	260	261.112	0.628319	0.55561	0	0.0086171	-0.886352	-0.788313	-0.171025	-0.101158	1.96328	1.93579	24512.6	25026.7	24127.1	22623.9	-30674.9	53298.8	163.852	155.962		24526.2
7.62581	261	262.042	0.628319	0.556011	0	0.0092428	-0.890972	-0.792457	-0.161679	-0.0926773	1.93859	1.9127	24748.6	25232.2	23819.6	22366.1	-31088.6	53454.7	161.763	154.599		24727.6
7.65502	262	262.974	0.628319	0.556414	0	0.00937741	-0.895334	-0.796415	-0.152385	-0.0856032	1.91378	1.88947	24993.7	25413.2	23488.9	22128.2	-31466.1	53594.3	159.517	153.228		24904.9
7.68424	263	263.906	0.628319	0.556799	0	0.00908457	-0.899439	-0.800159	-0.143146	-0.0797647	1.88885	1.86613	25240.7	25561.5	23144.8	21922.2	-31795.4	53717.6	157.18	151.937		25050.3
7.71346	264	264.84	0.628319	0.55715	0	0.00844446	-0.903287	-0.803664	-0.133961	-0.0749417	1.86382	1.84268	25481.9	25671.1	22797.6	21757.2	-32067.3	53824.5	154.823	150.803		25157.7
7.74268	265	265.774	0.628319	0.557454	0	0.00754902	-0.906882	-0.806913	-0.124832	-0.0708776	1.83867	1.81912	25708.6	25739	22459.6	21638.4	-32276.7	53915.1	152.527	149.88		25224.2
7.77189	266	266.708	0.628319	0.557704	0	0.00649719	-0.910223	-0.809892	-0.115758	-0.067293	1.81344	1.79547	25910.9	25765.8	22144.1	21566	-32423.1	53989.2	150.385	149.193		25250.5
7.80111	267	267.643	0.628319	0.557897	0	0.00539038	-0.913313	-0.812597	-0.106739	-0.0638988	1.78811	1.77173	26079.6	25755.2	21864.4	21536.1	-32510.8	54046.8	148.485	148.739		25240.1
7.83033	268	268.578	0.628319	0.558032	0	0.00432815	-0.916153	-0.815027	-0.0977734	-0.060408	1.7627	1.74793	26207.4	25712.8	21630.6	21541.6	-32546.4	54088	146.897	148.498		25198.5
7.85955	269	269.514	0.628319	0.558114	0	0.00340412	-0.918745	-0.817188	-0.0888614	-0.0565485	1.73721	1.72406	26290.6	25645.1	21448.7	21574.1	-32538.6	54112.8	145.662	148.438		25132.2
7.88876	270	270.449	0.628319	0.55815	0	0.002702	-0.921091	-0.81909	-0.0800012	-0.0520747	1.71166	1.70013	26329.2	25559	21319.1	21624.8	-32496.2	54121	144.782	148.526		25047.8
7.91798	271	271.384	0.628319	0.558149	0	0.00229201	-0.92319	-0.820748	-0.0711911	-0.0467789	1.68604	1.67616	26326.5	25460.5	21237.7	21685.4	-32427.4	54112.8	144.229	148.728		24951.3
7.9472	272	272.319	0.628319	0.558124	0	0.00222779	-0.925046	-0.822182	-0.0624293	-0.0405009	1.66037	1.65215	26288.1	25355.1	21197.1	21748.4	-32339.6	54088	143.953	149.014		24848
7.97642	273	273.253	0.628319	0.55809	0	0.00254422	-0.926659	-0.823413	-0.0537137	-0.0331347	1.63465	1.6281	26220.9	25247.5	21188.3	21807.5	-32239.4	54046.8	143.893	149.356		24742.6
8.00563	274	274.187	0.628319	0.558062	0	0.00325626	-0.928031	-0.824466	-0.0450418	-0.0246327	1.60889	1.60403	26131.6	25142.2	21201.9	21856.2	-32133	53989.2	143.986	149.723		24639.3
8.03485	275	275.121	0.628319	0.558058	0	0.00435908	-0.929162	-0.825367	-0.0364113	-0.0150054	1.5831	1.57993	26026.7	25043.9	21229.1	21887.8	-32027.3	53915.1	144.17	150.075		24543
8.06407	276	276.055	0.628319	0.558093	0	0.00582944	-0.930054	-0.826141	-0.0278193	-0.00431747	1.55728	1.55582	25912	24958	21262	21894.3	-31930.2	53824.5	144.394	150.359		24458.8
8.09329	277	276.989	0.628319	0.558182	0	0.00762799	-0.930708	-0.826812	-0.0192629	0.00731893	1.53143	1.53169	25792.3	24890.2	21293.7	21867.6	-31850	53717.6	144.609	150.515		24392.4
8.12251	278	277.922	0.628319	0.558339	0	0.00970241	-0.931124	-0.827398	-0.0107391	0.0197533	1.50557	1.50755	25672.6	24845.7	21317.3	21799.9	-31794.4	53594.3	144.769	150.483		24348.8
8.15172	279	278.856	0.628319	0.558573	0	0.0119908	-0.931305	-0.827917	-0.00224465	0.0328067	1.47971	1.48339	25558	24828	21325.5	21686.2	-31768.5	53454.7	144.825	150.216		24331.4
8.18094	280	279.79	0.628319	0.558892	0	0.0144251	-0.931249	-0.828378	0.00622375	0.0462821	1.45384	1.45922	25454.9	24838.1	21309.6	21524.3	-31774.5	53298.8	144.717	149.685		24341.4
8.21016	281	280.725	0.628319	0.559299	0	0.0169344	-0.930959	-0.828786	0.0146696	0.0599743	1.42797	1.43504	25369.7	24875.1	21260.6	21315.7	-31811	53126.6	144.385	148.881		24377.6
8.23938	282	281.661	0.628319	0.559794	0	0.0194482	-0.930434	-0.829144	0.0230964	0.0736784	1.40212	1.41084	25308.4	24936	21170.1	21064.2	-31874.2	52938.3	143.77	147.814		24437.3
8.26859	283	282.598	0.628319	0.560378	0	0.0218989	-0.929676	-0.829446	0.0315078	0.0871993	1.37628	1.38664	25275.4	25016.6	21032.4	20775.5	-31958.4	52733.9	142.834	146.503		24516.3
8.29781	284	283.536	0.628319	0.561045	0	0.0242249	-0.928684	-0.829687	0.0399076	0.100359	1.35047	1.36242	25272.3	25112.6	20845	20455.7	-32057.6	52513.4	141.562	144.973		24610.3
8.32703	285	284.475	0.628319	0.561789	0	0.0263725	-0.927459	-0.829856	0.0482996	0.113004	1.32469	1.33819	25298.5	25219.4	20609.3	20111.3	-32165.6	52276.9	139.961	143.25		24715
8.35625	286	285.416	0.628319	0.562603	0	0.0282986	-0.926001	-0.829939	0.0566877	0.125011	1.29895	1.31395	25351	25333.1	20329.3	19747.7	-32276.8	52024.4	138.06	141.355		24826.5
8.38546	287	286.358	0.628319	0.563478	0	0.0299719	-0.92431	-0.829921	0.0650757	0.136295	1.27325	1.2897	25425.8	25450.3	20010.9	19369.9	-32386.3	51756.2	135.898	139.312		24941.3
8.41468	288	287.302	0.628319	0.564402	0	0.0313742	-0.922385	-0.829783	0.0734677	0.146807	1.2476	1.26546	25518.5	25567.9	19660.8	18982.3	-32489.9	51472.1	133.52	137.14		25056.5
8.4439	289	288.248	0.628319	0.565365	0	0.0325006	-0.920228	-0.829507	0.0818677	0.156539	1.22201	1.24121	25624.3	25682.9	19285.4	18589.2	-32583.2	51172.4	130.97	134.862		25169.3
8.47312	290	289.196	0.628319	0.566356	0	0.0333589	-0.917837	-0.829073	0.0902797	0.16552	1.19648	1.21697	25739.1	25792.2	18890.7	18195.6	-32661.5	50857.1	128.29	132.508		25276.3
8.50233	291	290.145	0.628319	0.567362	0	0.0339686	-0.915212	-0.828462	0.0987078	0.173812	1.17102	1.19274	25859.5	25892	18482	17806.7	-32719.6	50526.3	125.514	130.115		25374.1
8.53155	292	291.097	0.628319	0.568376	0	0.0343586	-0.912353	-0.827659	0.107156	0.181505	1.14564	1.16852	25982	25978.6	18063.8	17428	-32752.2	50180.1	122.675	127.725		25459
8.56077	293	292.05	0.628319	0.569388	0	0.0345652	-0.909259	-0.826647	0.115629	0.188711	1.12033	1.14433	26103.5	26048.8	17641	17064	-32754.7	49818.6	119.803	125.373		25527.9
8.58999	294	293.005	0.628319	0.570392	0	0.03463	-0.905929	-0.825417	0.12413	0.195553	1.09512	1.12017	26220.3	26100.9	17218.6	16717.5	-32724.5	49442	116.934	123.088		25578.9
8.61921	295	293.962	0.628319	0.571385	0	0.034597	-0.902363	-0.823959	0.132664	0.202166	1.07001	1.09604	26328.3	26134.5	16802.4	16389.2	-32661.1	49050.3	114.108	120.885		25611.8
8.64842	296	294.92	0.628319	0.572363	0	0.034511	-0.898559	-0.822268	0.141234	0.20868	1.04499	1.07197	26423.1	26150.7	16398.3	16077.6	-32566.1	48643.6	111.364	118.764		25627.7
8.67764	297	295.88	0.628319	0.573326	0	0.0344154	-0.894516	-0.820341	0.149845	0.215225	1.02009	1.04794	26501.1	26151.8	16011.2	15779.8	-32442.3	48222.2	108.735	116.718		25628.8
8.70686	298	296.842	0.628319	0.574277	0	0.0343505	-0.890233	-0.818176	0.158501	0.221918	0.995301	1.02398	26560	26140.6	15644.1	15492.3	-32293.7	47786	106.242	114.733		25617.7
8.73608	299	297.805	0.628319	0.575216	0	0.0343519	-0.88571	-0.815776	0.167206	0.228862	0.970635	1.00008	26599	26120	15297.7	15211.1	-32124.2	47335.3	103.89	112.793		25597.6
8.76529	300	298.77	0.628319	0.576148	0	0.034449	-0.880944	-0.813141	0.175963	0.236142	0.946097	0.976261	26619.3	26092.9	14970.7	14932.6	-31937.6	46870.2	101.669	110.884		25571
8.79451	301	299.736	0.628319	0.577077	0	0.0346639	-0.875934	-0.810277	0.184778	0.243822	0.921696	0.952523	26622.9	26061.8	14660	14653.5	-31737.2	46390.8	99.5583	108.991		25540.5
8.82373	302	300.704	0.628319	0.578008	0	0.0350108	-0.870678	-0.807186	0.193653	0.251941	0.897436	0.928874	26612.7	26028.9	14361.7	14371.2	-31526	45897.2	97.5327	107.105		25508.3
8.85295	303	301.673	0.628319	0.578949	0	0.0354953	-0.865175	-0.803875	0.202593	0.260515	0.873327	0.905321	26591.9	25996.3	14071.8	14083.3	-31306.3	45389.7	95.5641	105.211		25476.3
8.88216	304	302.643	0.628319	0.579904	0	0.0361147	-0.859422	-0.800347	0.211601	0.269539	0.849373	0.88187	26563.4	25965.8	13786.5	13787.4	-31080.9	44868.3	93.6265	103.298		25446.5
8.91138	305	303.615	0.628319	0.58088	0	0.0368587	-0.853418	-0.796607	0.220682	0.278982	0.825583	0.858527	26529.9	25939.8	13502.4	13480.7	-30852.6	44333.3	91.6972	101.347		25421
8.9406	306	304.589	0.628319	0.581882	0	0.0377101	-0.847161	-0.792657	0.229839	0.2888	0.801964	0.835299	26493.7	25920.8	13216.7	13160.4	-30624.4	43784.8	89.7569	99.3354		25402.4
8.96982	307	305.565	0.628319	0.582914	0	0.0386465	-0.840649	-0.788499	0.239075	0.298934	0.778521	0.81219	26457	25911.1	12926.8	12823.7	-30399.2	43223	87.7883	97.2424		25392.9
8.99903	308	306.542	0.628319	0.583981	0	0.0396416	-0.833878	-0.784132	0.248394	0.309315	0.755263	0.789207	26422	25912.6	12630.2	12468.8	-30179.1	42647.9	85.7739	95.0494		25394.4
9.02825	309	307.521	0.628319	0.585083	0	0.0406668	-0.826848	-0.779551	0.257799	0.319868	0.732197	0.766355	26391.3	25926.3	12324	12094.9	-29965	42059.9	83.6945	92.7456		25407.8
9.05747	310	308.501	0.628319	0.586222	0	0.0416922	-0.819555	-0.774753	0.267294	0.33052	0.70933	0.743639	26367.7	25952	12005.2	11702.8	-29756.3	41459.1	81.5291	90.3285		25433
9.08669	311	309.484	0.628319	0.587398	0	0.0426885	-0.811998	-0.769729	0.276882	0.341198	0.686669	0.721066	26354	25988.9	11670.8	11294.2	-29551.5	40845.6	79.2584	87.803		25469.1
9.11591	312	310.469	0.628319	0.588608	0	0.0436274	-0.804172	-0.76447	0.286565	0.351834	0.664221	0.698642	26352.4	26035.2	11319	10871.7	-29348.1	40219.7	76.869	85.179		25514.5
9.14512	313	311.456	0.628319	0.58985	0	0.0444831	-0.796077	-0.758966	0.296347	0.362369	0.641995	0.676373	26364.1	26089.3	10948.9	10438.3	-29143.3	39581.6	74.3559	82.4692		25567.5
9.17434	314	312.445	0.628319	0.591121	0	0.045233	-0.787708	-0.753206	0.30623	0.372752	0.619997	0.654267	26389.2	26149	10561.3	9996.88	-28934.5	38931.4	71.7239	79.6868		25626
9.20356	315	313.436	0.628319	0.592416	0	0.0458584	-0.779063	-0.747177	0.316217	0.382946	0.598236	0.632332	26426.9	26212.6	10158.2	9550.21	-28719.1	38269.3	68.9859	76.8443		25688.4
9.23278	316	314.43	0.628319	0.593731	0	0.0463452	-0.770139	-0.740866	0.32631	0.392926	0.576719	0.610575	26475.4	26278.6	9742.07	9100.68	-28494.9	37595.6	66.1601	73.9531		25753.1
9.26199	317	315.426	0.628319	0.595061	0	0.0466843	-0.760933	-0.734259	0.336511	0.40268	0.555453	0.589005	26532.9	26345.6	9316.06	8650.41	-28260	36910.4	63.2669	71.0238		25818.7
9.29121	318	316.424	0.628319	0.5964	0	0.0468724	-0.751443	-0.727343	0.346822	0.412212	0.534447	0.567631	26597.3	26412.3	8883.16	8201.4	-28012.6	36214	60.3271	68.0675		25884.1
9.32043	319	317.425	0.628319	0.597742	0	0.0469115	-0.741665	-0.720102	0.357245	0.421536	0.513709	0.546462	26666.8	26477.4	8446.19	7755.67	-27750.9	35506.6	57.3596	65.097		25947.9
9.34965	320	318.428	0.628319	0.599083	0	0.0468095	-0.731595	-0.712525	0.36778	0.430683	0.493246	0.525509	26739.5	26539.3	8007.63	7315.43	-27472.9	34788.3	54.3812	62.1281		26008.5
9.37886	321	319.433	0.628319	0.600416	0	0.0465798	-0.721231	-0.704598	0.378429	0.439696	0.473068	0.50478	26814.2	26596.5	7569.65	6882.95	-27176.5	34059.5	51.4068	59.1779		26064.5
9.40808	322	320.44	0.628319	0.601737	0	0.0462413	-0.71057	-0.696309	0.389193	0.448626	0.453181	0.484287	26889.2	26647.3	7134.29	6460.23	-26860	33320.2	48.4502	56.2636		26114.4
9.4373	323	321.45	0.628319	0.603043	0	0.0458173	-0.699608	-0.687647	0.400071	0.457536	0.433594	0.464041	26963.2	26690.9	6703.62	6048.71	-26522.1	32570.8	45.5254	53.3995		26157.1
9.46652	324	322.462	0.628319	0.60433	0	0.0453353	-0.688343	-0.678604	0.411065	0.466494	0.414316	0.444053	27034.3	26726.7	6279.87	5649.07	-26162.5	31811.5	42.6477	50.5956		26192.2
9.49573	325	323.476	0.628319	0.605595	0	0.0448254	-0.67677	-0.669172	0.422173	0.47557	0.395356	0.424336	27100.5	26755.1	5865.29	5261.28	-25781.3	31042.5	39.8322	47.8576		26220
9.52495	326	324.493	0.628319	0.606838	0	0.0443192	-0.664888	-0.659343	0.433395	0.484836	0.376721	0.4049	27160.2	26776.8	5461.85	4884.76	-25379.3	30264.1	37.0923	45.1877		26241.3
9.55417	327	325.511	0.628319	0.608059	0	0.0438472	-0.652692	-0.649112	0.444729	0.494357	0.35842	0.385758	27212	26793.1	5070.9	4518.63	-24957.8	29476.4	34.4374	42.5858		26257.2
9.58339	328	326.531	0.628319	0.609259	0	0.0434359	-0.64018	-0.638476	0.456174	0.504185	0.340463	0.366922	27255.3	26805	4693.03	4161.99	-24517.8	28679.8	31.8712	40.0502		26268.9
9.61261	329	327.553	0.628319	0.610441	0	0.0431032	-0.627348	-0.627432	0.467727	0.514351	0.322858	0.348404	27290.3	26813.8	4328.04	3813.97	-24060.4	27874.4	29.3925	37.5777		26277.5
9.64182	330	328.577	0.628319	0.611608	0	0.0428522	-0.614194	-0.615979	0.479386	0.524858	0.305614	0.330216	27317.8	26820.5	3975.19	3473.92	-23586.6	27060.5	26.9962	35.1623		26284.1
9.67104	331	329.603	0.628319	0.612767	0	0.0426647	-0.600714	-0.604116	0.491147	0.535664	0.288739	0.312371	27339	26825.9	3633.42	3141.29	-23097.1	26238.4	24.6752	32.7942		26289.4
9.70026	332	330.631	0.628319	0.613921	0	0.0424967	-0.586907	-0.591843	0.503006	0.546682	0.272244	0.29488	27355	26830.7	3301.59	2815.61	-22592.7	25408.3	22.4217	30.4583		26294.1
9.72948	333	331.661	0.628319	0.615077	0	0.0422774	-0.572769	-0.579157	0.514959	0.557782	0.256136	0.277756	27367.4	26835.7	2978.68	2496.36	-22074.1	24570.4	20.2287	28.1338		26298.9
9.75869	334	332.692	0.628319	0.616242	0	0.0419148	-0.558297	-0.566059	0.527	0.568811	0.240426	0.261011	27377.3	26841.5	2663.83	2182.86	-21542.2	23725.1	18.0905	25.7956		26304.6
9.78791	335	333.726	0.628319	0.617419	0	0.041308	-0.54349	-0.552544	0.539123	0.579613	0.225123	0.244656	27385.7	26849.1	2356.41	1874.33	-20998.2	22872.5	16.0028	23.4177		26312.1
9.81713	336	334.761	0.628319	0.618609	0	0.0403635	-0.528345	-0.538604	0.551322	0.590062	0.210235	0.228703	27393.6	26859.7	2055.97	1570.02	-20443	22013	13.9624	20.978		26322.5
9.84635	337	335.798	0.628319	0.619805	0	0.0390118	-0.512861	-0.524225	0.563588	0.600075	0.195773	0.213165	27401.9	26874.1	1762.12	1269.5	-19877.3	21146.8	11.9669	18.4637		26336.6
9.87556	338	336.838	0.628319	0.620991	0	0.0372207	-0.497034	-0.509386	0.575913	0.609633	0.181746	0.198054	27411.6	26893.1	1474.51	972.832	-19301.3	20274.1	10.0136	15.875		26355.2
9.90478	339	337.879	0.628319	0.622139	0	0.0350016	-0.480865	-0.494059	0.588288	0.618769	0.168164	0.183381	27424	26917	1192.71	680.677	-18714.6	19395.2	8.09993	13.2261		26378.6
9.934	340	338.923	0.628319	0.62322	0	0.0324077	-0.464351	-0.478216	0.600702	0.627571	0.155035	0.169161	27440.3	26945.6	916.43	394.218	-18116.3	18510.5	6.22363	10.5432		26406.7
9.96322	341	339.968	0.628319	0.624204	0	0.0295258	-0.447492	-0.461836	0.613144	0.636162	0.142369	0.155407	27461.6	26978.6	645.562	115.002	-17505.1	17620.1	4.38412	7.8612		26439
9.99243	342	341.017	0.628319	0.625069	0	0.0264632	-0.430288	-0.444891	0.625602	0.644696	0.130177	0.142122	27488.5	27015.3	380.381	-154.665	-16879	16724.3	2.58323	4.07603		26475
10.0217	343	342.067	0.628319	0.625804	0	0.0233344	-0.412737	-0.427404	0.638063	0.653308	0.118468	0.129339	27521.3	27055.3	121.535	-413.903	-16237.4	15823.5	0.825363	2.07585		26514.1
10.0509	344	343.119	0.628319	0.62641	0	0.0202483	-0.39484	-0.409381	0.650511	0.66213	0.107251	0.117072	27559.7	27097.7	-130.017	-661.11	-15578.9	14917.8	-0.689221	0.160599		26555.7
10.0801	345	344.171	0.628319	0.626896	0	0.0172985	-0.376597	-0.390864	0.662931	0.671252	0.0965354	0.105349	27602.9	27142.1	-373.143	-895.781	-14903.3	14007.6	-1.97803	-1.64965		26599.2
10.1093	346	345.222	0.628319	0.627275	0	0.0145577	-0.358011	-0.371874	0.675308	0.680741	0.0863318	0.0941833	27650.2	27187.9	-606.666	-1116.82	-14209.9	13093.1	-3.21594	-3.33777		26644.1
10.1385	347	346.274	0.628319	0.627565	0	0.0120755	-0.339081	-0.352429	0.687622	0.690628	0.0766491	0.0835859	27700.5	27234.5	-829.478	-1323.24	-13497.8	12174.6	-4.39706	-4.89202		26689.8
10.1677	348	347.326	0.628319	0.627782	0	0.00987936	-0.31981	-0.332549	0.699854	0.700906	0.0674971	0.073568	27752.9	27281.4	-1040.6	-1514.22	-12766.6	11252.4	-5.51621	-6.30552		26735.8
10.197	349	348.378	0.628319	0.627941	0	0.0079771	-0.300201	-0.31225	0.711985	0.711539	0.058885	0.0641404	27806.5	27327.9	-1239.2	-1689.09	-12015.9	10326.8	-6.56902	-7.57536		26781.4
10.2262	350	349.43	0.628319	0.628056	0	0.00636107	-0.280257	-0.291548	0.723992	0.722468	0.0508224	0.0553142	27860.7	27373.1	-1424.64	-1847.3	-11245.3	9398.02	-7.55199	-8.70188		26825.6
10.2554	351	350.482	0.628319	0.628138	0	0.00501216	-0.259981	-0.270454	0.735854	0.733621	0.0433183	0.0471002	27915	27416.5	-1596.49	-1988.66	-10455.1	8466.4	-8.463	-9.68881		26868.1
10.2846	352	351.533	0.628319	0.628195	0	0.00390361	-0.239377	-0.248981	0.747545	0.744917	0.036382	0.0395091	27970.1	27458.7	-1754.77	-2113.53	-9645.72	7532.19	-9.30205	-10.5438		26909.5
10.3138	353	352.585	0.628319	0.628235	0	0.00300291	-0.218452	-0.227138	0.759041	0.756271	0.0300225	0.0325516	28028.7	27503.1	-1900.2	-2223.24	-8818.94	6595.7	-10.073	-11.28		26953
10.343	354	353.637	0.628319	0.628263	0	0.00227376	-0.197211	-0.204936	0.770315	0.767599	0.0242487	0.0262379	28096.5	27556.4	-2033.94	-2319.7	-7976.89	5657.19	-10.7819	-11.9135		27005.2
10.3723	355	354.689	0.628319	0.628281	0	0.0016708	-0.175659	-0.182384	0.781339	0.778817	0.0190693	0.0205784	28183.2	27629.6	-2157.51	-2405.24	-7122.2	4716.96	-11.4369	-12.4627		27077
10.4015	356	355.741	0.628319	0.628294	0	0.00114829	-0.153805	-0.159492	0.792084	0.789849	0.0144927	0.0155829	28297.4	27733	-2270.99	-2480.45	-6255.75	3775.3	-12.0385	-12.9362		27178.3
10.4307	357	356.793	0.628319	0.628302	0	0.000625826	-0.131657	-0.13627	0.80252	0.800613	0.0105273	0.0112613	28453.1	27882.2	-2374.34	-2545.8	-5378.28	2832.48	-12.5864	-13.3438		27324.5
10.4599	358	357.844	0.628319	0.628308	0	7.29127e-05	-0.109224	-0.112729	0.812616	0.811069	0.00718103	0.00762286	28647.6	28074.5	-2462.94	-2596.08	-4484.88	1888.8	-13.056	-13.6628		27513
10.4891	359	358.896	0.628319	0.62831	0	-0.000723495	-0.0865155	-0.088881	0.82234	0.821125	0.0044618	0.00467679	28909.3	28341	-2536.42	-2631.94	-3576.49	944.547	-13.4456	-13.916		27774.2
10.5184	360	359.948	0.628319	0.628313	0	-0.00152941	-0.0635423	-0.0647388	0.831659	0.830856	0.00237707	0.00243186	29177.5	28614.8	-2582.18	-2637.43	-2637.44	0.00580067	-13.6881	-14.0063		28042.5
10.5184	360	359.948	0.628319	0.628319	0	0.0857121	1.01449	0.928492	0.899855	0.969783	3.00146	3.00144	47118.7	46009.8	27734	26840.7	68593.7	54121	188.346	173.461
